# Supplementary material for: Intermolecular interactions of CTAB and potential oxidation inhibitors: physico-chemical controlled approach for food/pharmaceutical function
Source: Royal Society of Chemistry journal article supplement (doi:10.1039/c4ra04386c), 2014-09-26
Supplement: c4ra04386c1.pdf [file c4ra04386c1.pdf]

# Intermolecular Interactions of CTAB and Potential Oxidation Inhibitors: Physico-chemical Controlled Approach for Food/Pharmaceutical

## Function

Varun Bhardwaj <sup>a</sup>, Kundan Sharma <sup>b</sup>, S. Chauhan <sup>c</sup>, Poonam Sharma <sup>a,\*</sup>

<sup>a</sup>*Department of Biotechnology, Bioinformatics and Pharmacy, Jaypee University of Information Technology, Waknaghat, Solan, 173234 Himachal Pradesh, India.*

<sup>b</sup>*Department of Applied Chemistry, Amity Institute of Applied Sciences, Amity University, Noida 201313, India.*

<sup>c</sup>*Department of Chemistry, Himachal Pradesh University, Summer hill, Shimla 173005 Himachal Pradesh, India.*

**ST1** Density,  $\rho$  ( $\text{kg}\cdot\text{m}^{-3}$ ), ultrasonic velocity,  $u$  ( $\text{m}\cdot\text{s}^{-1}$ ) and Isentropic Compressibility,  $\kappa_s$  ( $\text{TPa}^{-1}$ ) of CTAB (0.2–1.8)  $\text{mmol}\cdot\text{kg}^{-1}$  in water-ethanol compositions (v/v %) of 0.03  $\text{mol}\cdot\text{kg}^{-1}$  BHA over different temperatures ranging from (298.15 to 308.15) K.

| $10^3\cdot[\text{CTAB}]$<br>$\text{mol}\cdot\text{kg}^{-1}$ | 100% v/v Ethanol |         |         | 70% v/v Ethanol |         |         | 30% v/v Ethanol |         |         |
|-------------------------------------------------------------|------------------|---------|---------|-----------------|---------|---------|-----------------|---------|---------|
|                                                             | 298.15K          | 303.15K | 308.15K | 298.15K         | 303.15K | 308.15K | 298.15K         | 303.15K | 308.15K |
| $\rho/\text{kg}\cdot\text{m}^{-3}$                          |                  |         |         |                 |         |         |                 |         |         |
| 0.0                                                         | 792.834          | 787.242 | 775.189 | 846.883         | 835.142 | 822.195 | 888.165         | 878.283 | 869.232 |
| 0.2                                                         | 781.841          | 776.522 | 764.291 | 839.832         | 828.914 | 816.732 | 882.670         | 873.384 | 864.442 |
| 0.4                                                         | 780.271          | 775.885 | 764.192 | 838.615         | 827.889 | 816.003 | 881.193         | 872.142 | 863.438 |
| 0.6                                                         | 781.152          | 776.171 | 764.182 | 838.884         | 827.992 | 816.005 | 881.024         | 872.003 | 863.399 |
| 0.8                                                         | 782.529          | 777.318 | 765.608 | 839.788         | 828.878 | 817.154 | 882.663         | 873.332 | 864.392 |
| 1.0                                                         | 782.317          | 777.343 | 765.542 | 839.715         | 828.804 | 817.096 | 882.616         | 873.312 | 864.316 |
| 1.2                                                         | 782.263          | 777.310 | 765.471 | 839.656         | 828.735 | 817.004 | 882.574         | 873.256 | 864.278 |
| 1.4                                                         | 782.165          | 777.262 | 765.401 | 839.601         | 828.697 | 816.985 | 882.492         | 873.184 | 864.224 |
| 1.6                                                         | 782.002          | 777.182 | 765.337 | 839.534         | 828.622 | 816.889 | 882.403         | 873.102 | 864.169 |
| 1.8                                                         | 781.994          | 777.095 | 765.283 | 839.473         | 828.584 | 816.815 | 882.378         | 873.047 | 864.116 |
| $u/\text{m}\cdot\text{s}^{-1}$                              |                  |         |         |                 |         |         |                 |         |         |
| 0.0                                                         | 1162.32          | 1149.66 | 1120.11 | 1295.25         | 1281.45 | 1268.77 | 1528.14         | 1516.68 | 1501.18 |
| 0.2                                                         | 1155.88          | 1138.55 | 1114.17 | 1291.14         | 1276.38 | 1261.28 | 1523.44         | 1510.73 | 1494.62 |
| 0.4                                                         | 1156.11          | 1138.72 | 1114.84 | 1291.32         | 1276.51 | 1261.35 | 1523.58         | 1510.88 | 1494.84 |
| 0.6                                                         | 1156.37          | 1138.97 | 1114.99 | 1291.45         | 1276.79 | 1261.44 | 1523.76         | 1510.96 | 1494.99 |
| 0.8                                                         | 1156.72          | 1139.19 | 1115.23 | 1291.66         | 1276.94 | 1261.65 | 1523.97         | 1511.14 | 1495.16 |
| 1.0                                                         | 1156.92          | 1139.36 | 1115.56 | 1291.79         | 1277.33 | 1261.79 | 1524.16         | 1511.25 | 1495.37 |
| 1.2                                                         | 1157.34          | 1139.78 | 1115.85 | 1291.88         | 1277.58 | 1261.93 | 1524.45         | 1511.39 | 1495.52 |
| 1.4                                                         | 1157.63          | 1140.02 | 1116.11 | 1291.97         | 1277.62 | 1262.09 | 1524.69         | 1511.54 | 1495.77 |
| 1.6                                                         | 1157.84          | 1140.18 | 1116.35 | 1292.06         | 1277.73 | 1262.24 | 1524.84         | 1511.68 | 1495.88 |
| 1.8                                                         | 1158.08          | 1140.32 | 1116.62 | 1292.15         | 1277.81 | 1262.38 | 1524.92         | 1511.77 | 1495.91 |
| $10^{-10}\cdot\kappa_s \text{ TPa}^{-1}$                    |                  |         |         |                 |         |         |                 |         |         |
| 0.2                                                         | 9.573            | 9.934   | 1.054*  | 7.143           | 7.405   | 7.697   | 4.881           | 5.017   | 5.178   |
| 0.4                                                         | 9.589            | 9.940   | 1.052   | 7.151           | 7.413   | 7.703   | 4.889           | 5.023   | 5.183   |
| 0.6                                                         | 9.574            | 9.932   | 1.052   | 7.147           | 7.409   | 7.701   | 4.889           | 5.023   | 5.182   |
| 0.8                                                         | 9.551            | 9.910   | 1.050   | 7.137           | 7.399   | 7.688   | 4.878           | 5.014   | 5.175   |
| 1.0                                                         | 9.550            | 9.910   | 1.049   | 7.136           | 7.395   | 7.687   | 4.877           | 5.014   | 5.174   |
| 1.2                                                         | 9.544            | 9.903   | 1.049   | 7.136           | 7.393   | 7.686   | 4.876           | 5.013   | 5.173   |
| 1.4                                                         | 9.540            | 9.899   | 1.048   | 7.135           | 7.393   | 7.684   | 4.874           | 5.013   | 5.172   |
| 1.6                                                         | 9.539            | 9.898   | 1.048   | 7.135           | 7.392   | 7.683   | 4.874           | 5.012   | 5.171   |
| 1.8                                                         | 9.535            | 9.896   | 1.048   | 7.135           | 7.391   | 7.682   | 4.874           | 5.012   | 5.172   |

\*  $\kappa_s \text{ TPa}^{-1}\cdot 10^{-9}$ . Standard uncertainties in  $\rho$ ,  $u$  and  $\kappa_s$  are  $\pm 2\cdot 10^{-3} \text{ kg}\cdot\text{m}^{-3}$ ,  $\pm 0.3 \text{ m}\cdot\text{s}^{-1}$  and  $\pm 0.02\cdot 10^{-10} \text{ TPa}^{-1}$ . For temperature measurements (T/K), it comes out to be  $\pm 0.02 \text{ K}$

**ST2**,  $\rho$  ( $\text{kg}\cdot\text{m}^{-3}$ ), ultrasonic velocity,  $u$  ( $\text{m}\cdot\text{s}^{-1}$ ) and Isentropic Compressibility,  $\kappa_s$  ( $\text{TPa}^{-1}$ ) of CTAB (0.2–1.8)  $\text{mmol}\cdot\text{kg}^{-1}$  in water-1-propanol compositions (v/v %) of 0.03  $\text{mol}\cdot\text{kg}^{-1}$  BHA over different temperatures ranging from (298.15 to 308.15) K.

| $10^3\cdot[\text{CTAB}]$<br>$\text{mol}\cdot\text{kg}^{-1}$ | 100% v/v <b>1-propanol</b> |         |         | 70% v/v <b>1-propanol</b> |         |         | 30% v/v <b>1-propanol</b> |         |         |
|-------------------------------------------------------------|----------------------------|---------|---------|---------------------------|---------|---------|---------------------------|---------|---------|
|                                                             | 298.15K                    | 303.15K | 308.15K | 298.15K                   | 303.15K | 308.15K | 298.15K                   | 303.15K | 308.15K |
| <b><math>\rho/\text{kg}\cdot\text{m}^{-3}</math></b>        |                            |         |         |                           |         |         |                           |         |         |
| 0.0                                                         | 831.943                    | 828.849 | 820.442 | 856.664                   | 847.192 | 836.838 | 889.838                   | 875.719 | 868.424 |
| 0.2                                                         | 810.024                    | 806.543 | 798.786 | 848.223                   | 839.348 | 829.744 | 880.323                   | 866.948 | 858.778 |
| 0.4                                                         | 808.915                    | 805.455 | 797.834 | 847.938                   | 839.124 | 829.712 | 879.857                   | 866.933 | 858.723 |
| 0.6                                                         | 807.564                    | 804.684 | 796.459 | 847.893                   | 839.094 | 829.675 | 879.548                   | 866.675 | 858.699 |
| 0.8                                                         | 810.876                    | 806.588 | 798.658 | 847.812                   | 839.573 | 829.616 | 880.304                   | 866.649 | 858.747 |
| 1.0                                                         | 810.816                    | 806.504 | 798.586 | 847.238                   | 839.515 | 829.688 | 880.275                   | 866.592 | 858.683 |
| 1.2                                                         | 810.776                    | 806.449 | 798.512 | 847.189                   | 839.456 | 829.594 | 880.237                   | 866.535 | 858.624 |
| 1.4                                                         | 810.558                    | 806.398 | 798.442 | 847.095                   | 839.398 | 829.535 | 880.183                   | 866.489 | 858.598 |
| 1.6                                                         | 810.495                    | 806.315 | 798.388 | 846.993                   | 839.332 | 829.489 | 880.116                   | 866.435 | 858.556 |
| 1.8                                                         | 810.435                    | 806.264 | 798.311 | 846.924                   | 839.284 | 829.444 | 880.078                   | 866.408 | 858.525 |
| <b><math>u/\text{m}\cdot\text{s}^{-1}</math></b>            |                            |         |         |                           |         |         |                           |         |         |
| 0.0                                                         | 1228.82                    | 1219.54 | 1198.39 | 1364.94                   | 1355.33 | 1346.78 | 1574.84                   | 1559.36 | 1542.04 |
| 0.2                                                         | 1221.76                    | 1214.34 | 1193.43 | 1361.48                   | 1348.39 | 1339.39 | 1569.84                   | 1552.43 | 1543.03 |
| 0.4                                                         | 1221.84                    | 1214.55 | 1193.54 | 1361.59                   | 1348.48 | 1339.43 | 1569.97                   | 1552.58 | 1543.28 |
| 0.6                                                         | 1221.98                    | 1214.68 | 1193.65 | 1361.84                   | 1348.62 | 1339.68 | 1570.06                   | 1552.69 | 1543.37 |
| 0.8                                                         | 1222.12                    | 1214.82 | 1193.78 | 1361.96                   | 1348.85 | 1339.74 | 1570.28                   | 1552.75 | 1543.48 |
| 1.0                                                         | 1222.31                    | 1215.04 | 1193.92 | 1362.15                   | 1348.91 | 1339.87 | 1570.44                   | 1552.84 | 1543.65 |
| 1.2                                                         | 1222.42                    | 1215.22 | 1194.09 | 1362.39                   | 1349.06 | 1340.03 | 1570.68                   | 1552.96 | 1543.78 |
| 1.4                                                         | 1222.55                    | 1215.39 | 1194.21 | 1362.54                   | 1349.08 | 1340.16 | 1570.74                   | 1553.12 | 1543.87 |
| 1.6                                                         | 1222.56                    | 1215.44 | 1194.35 | 1362.66                   | 1349.17 | 1340.32 | 1570.81                   | 1552.28 | 1543.98 |
| 1.8                                                         | 1222.69                    | 1215.45 | 1194.38 | 1362.69                   | 1349.26 | 1340.34 | 1570.83                   | 1552.35 | 1544.04 |
| <b><math>10^{-10}\cdot\kappa_s \text{TPa}^{-1}</math></b>   |                            |         |         |                           |         |         |                           |         |         |
| 0.2                                                         | 8.270                      | 8.408   | 8.790   | 6.360                     | 6.553   | 6.718   | 4.609                     | 4.786   | 4.891   |
| 0.4                                                         | 8.281                      | 8.416   | 8.799   | 6.361                     | 6.554   | 6.718   | 4.611                     | 4.785   | 4.889   |
| 0.6                                                         | 8.293                      | 8.422   | 8.812   | 6.359                     | 6.553   | 6.716   | 4.612                     | 4.786   | 4.889   |
| 0.8                                                         | 8.257                      | 8.401   | 8.786   | 6.359                     | 6.547   | 6.716   | 4.607                     | 4.786   | 4.888   |
| 1.0                                                         | 8.255                      | 8.398   | 8.785   | 6.361                     | 6.546   | 6.714   | 4.606                     | 4.786   | 4.887   |
| 1.2                                                         | 8.254                      | 8.396   | 8.783   | 6.359                     | 6.545   | 6.713   | 4.605                     | 4.785   | 4.887   |
| 1.4                                                         | 8.254                      | 8.395   | 8.782   | 6.359                     | 6.546   | 6.712   | 4.605                     | 4.784   | 4.886   |
| 1.6                                                         | 8.255                      | 8.395   | 8.781   | 6.358                     | 6.545   | 6.711   | 4.605                     | 4.790   | 4.886   |
| 1.8                                                         | 8.254                      | 8.395   | 8.781   | 6.359                     | 6.545   | 6.711   | 4.605                     | 4.790   | 4.886   |

\*  $\kappa_s \text{TPa}^{-1}\cdot 10^{-9}$ . Standard uncertainties in  $\rho$ ,  $u$  and  $\kappa_s$  are  $\pm 3\cdot 10^{-3} \text{kg}\cdot\text{m}^{-3}$ ,  $\pm 0.4 \text{m}\cdot\text{s}^{-1}$  and  $\pm 0.15\cdot 10^{-10} \text{TPa}^{-1}$ . For temperature measurements (T/K), it comes out to be  $\pm 0.01 \text{K}$

**ST3** Density,  $\rho$  ( $\text{kg}\cdot\text{m}^{-3}$ ), ultrasonic velocity,  $u$  ( $\text{m}\cdot\text{s}^{-1}$ ) and Isentropic Compressibility,  $\kappa_s$  ( $\text{TPa}^{-1}$ ) of CTAB (0.2–1.8)  $\text{mmol}\cdot\text{kg}^{-1}$  in water-ethanol compositions (% v/v) of 0.02  $\text{mol}\cdot\text{kg}^{-1}$  BHT over different temperatures ranging from (298.15 to 308.15) K.

| $10^3\cdot[\text{CTAB}]$<br>$\text{mol}\cdot\text{kg}^{-1}$ | 100% v/v Ethanol |         |         | 70% v/v Ethanol |         |         | 30% v/v Ethanol |         |         |
|-------------------------------------------------------------|------------------|---------|---------|-----------------|---------|---------|-----------------|---------|---------|
|                                                             | 298.15K          | 303.15K | 308.15K | 298.15K         | 303.15K | 308.15K | 298.15K         | 303.15K | 308.15K |
| <b><math>\rho/\text{kg}\cdot\text{m}^{-3}</math></b>        |                  |         |         |                 |         |         |                 |         |         |
| 0.0                                                         | 803.872          | 797.322 | 787.436 | 859.242         | 848.847 | 839.659 | 902.594         | 892.748 | 882.073 |
| 0.2                                                         | 789.644          | 782.943 | 773.495 | 847.844         | 837.728 | 829.744 | 892.183         | 882.848 | 871.848 |
| 0.4                                                         | 788.345          | 781.323 | 772.748 | 846.263         | 836.985 | 828.893 | 891.747         | 881.999 | 870.993 |
| 0.6                                                         | 788.013          | 780.044 | 772.003 | 846.145         | 836.294 | 828.381 | 891.043         | 881.384 | 870.283 |
| 0.8                                                         | 788.003          | 780.928 | 771.937 | 847.858         | 836.193 | 828.316 | 891.994         | 881.371 | 870.225 |
| 1.0                                                         | 788.038          | 780.902 | 771.911 | 847.713         | 836.187 | 828.274 | 891.916         | 881.354 | 870.184 |
| 1.2                                                         | 788.002          | 780.884 | 771.891 | 847.685         | 836.132 | 828.222 | 891.894         | 881.312 | 870.121 |
| 1.4                                                         | 787.994          | 780.845 | 771.874 | 847.627         | 836.096 | 828.184 | 891.843         | 881.274 | 870.094 |
| 1.6                                                         | 787.952          | 780.843 | 771.818 | 847.583         | 836.001 | 828.113 | 891.804         | 881.233 | 870.023 |
| 1.8                                                         | 787.915          | 780.815 | 771.794 | 847.517         | 835.986 | 828.082 | 891.799         | 881.195 | 870.007 |
| <b><math>u/\text{m}\cdot\text{s}^{-1}</math></b>            |                  |         |         |                 |         |         |                 |         |         |
| 0.0                                                         | 1184.14          | 1168.38 | 1154.24 | 1326.39         | 1299.29 | 1284.92 | 1557.38         | 1543.45 | 1529.74 |
| 0.2                                                         | 1171.23          | 1164.22 | 1152.43 | 1310.35         | 1294.43 | 1272.14 | 1548.84         | 1538.85 | 1518.84 |
| 0.4                                                         | 1171.39          | 1164.34 | 1152.47 | 1310.64         | 1294.75 | 1272.47 | 1548.92         | 1538.98 | 1519.35 |
| 0.6                                                         | 1171.54          | 1164.58 | 1152.64 | 1310.87         | 1294.81 | 1272.69 | 1549.26         | 1539.15 | 1519.44 |
| 0.8                                                         | 1171.73          | 1164.74 | 1152.72 | 1310.98         | 1294.99 | 1272.83 | 1549.43         | 1539.32 | 1519.61 |
| 1.0                                                         | 1171.94          | 1164.89 | 1152.88 | 1311.34         | 1295.12 | 1273.14 | 1549.64         | 1539.48 | 1519.74 |
| 1.2                                                         | 1172.28          | 1165.03 | 1152.95 | 1311.49         | 1295.35 | 1273.32 | 1549.82         | 1539.64 | 1519.85 |
| 1.4                                                         | 1172.43          | 1165.25 | 1153.05 | 1311.58         | 1295.54 | 1273.58 | 1549.98         | 1539.79 | 1519.97 |
| 1.6                                                         | 1172.64          | 1165.48 | 1153.24 | 1311.74         | 1295.71 | 1273.93 | 1550.04         | 1539.85 | 1520.05 |
| 1.8                                                         | 1172.88          | 1165.49 | 1153.28 | 1311.83         | 1295.79 | 1273.99 | 1550.11         | 1539.92 | 1520.16 |
| <b><math>10^{-10}\cdot\kappa_s \text{ TPa}^{-1}</math></b>  |                  |         |         |                 |         |         |                 |         |         |
| 0.2                                                         | 9.232            | 9.423   | 9.734   | 6.869           | 7.124   | 7.447   | 4.672           | 4.783   | 4.972   |
| 0.4                                                         | 9.244            | 9.441   | 9.743   | 6.879           | 7.127   | 7.451   | 4.674           | 4.787   | 4.974   |
| 0.6                                                         | 9.246            | 9.452   | 9.749   | 6.878           | 7.132   | 7.453   | 4.676           | 4.789   | 4.977   |
| 0.8                                                         | 9.243            | 9.439   | 9.749   | 6.863           | 7.131   | 7.452   | 4.670           | 4.788   | 4.976   |
| 1.0                                                         | 9.239            | 9.437   | 9.746   | 6.860           | 7.130   | 7.449   | 4.669           | 4.787   | 4.976   |
| 1.2                                                         | 9.234            | 9.435   | 9.745   | 6.859           | 7.128   | 7.447   | 4.668           | 4.787   | 4.975   |
| 1.4                                                         | 9.232            | 9.432   | 9.744   | 6.858           | 7.126   | 7.444   | 4.667           | 4.786   | 4.975   |
| 1.6                                                         | 9.229            | 9.428   | 9.741   | 6.857           | 7.125   | 7.441   | 4.667           | 4.786   | 4.975   |
| 1.8                                                         | 9.226            | 9.428   | 9.741   | 6.856           | 7.124   | 7.440   | 4.667           | 4.786   | 4.974   |

\*  $\kappa_s \text{ TPa}^{-1}\cdot 10^{-9}$ . Standard uncertainties in  $\rho$ ,  $u$  and  $\kappa_s$  are  $\pm 4\cdot 10^{-3} \text{ kg}\cdot\text{m}^{-3}$ ,  $\pm 0.5 \text{ m}\cdot\text{s}^{-1}$  and  $\pm 0.25\cdot 10^{-10} \text{ TPa}^{-1}$ . For temperature measurements (T/K), it comes out to be  $\pm 0.01 \text{ K}$

**ST4** Density,  $\rho$  ( $\text{kg}\cdot\text{m}^{-3}$ ), ultrasonic velocity,  $u$  ( $\text{m}\cdot\text{s}^{-1}$ ) and Isentropic Compressibility,  $\kappa_s$  ( $\text{TPa}^{-1}$ ) of CTAB (0.2–1.8)  $\text{mmol}\cdot\text{kg}^{-1}$  in water-1-propanol compositions (% v/v) of 0.02  $\text{mol}\cdot\text{kg}^{-1}$  BHT over different temperatures ranging from (298.15 to 308.15) K.

| $10^3\cdot[\text{CTAB}]$<br>$\text{mol}\cdot\text{kg}^{-1}$ | 100% v/v <b>1-propanol</b> |         |         | 70% v/v <b>1-propanol</b> |         |         | 30% v/v <b>1-propanol</b> |         |         |
|-------------------------------------------------------------|----------------------------|---------|---------|---------------------------|---------|---------|---------------------------|---------|---------|
|                                                             | 298.15K                    | 303.15K | 308.15K | 298.15K                   | 303.15K | 308.15K | 298.15K                   | 303.15K | 308.15K |
| <b><math>\rho/\text{kg}\cdot\text{m}^{-3}</math></b>        |                            |         |         |                           |         |         |                           |         |         |
| 0.0                                                         | 858.588                    | 847.257 | 834.954 | 887.969                   | 869.658 | 855.359 | 926.268                   | 906.709 | 887.958 |
| 0.2                                                         | 825.658                    | 815.365 | 803.265 | 865.748                   | 848.254 | 833.265 | 901.965                   | 884.328 | 866.768 |
| 0.4                                                         | 824.748                    | 814.354 | 802.369 | 865.455                   | 848.176 | 833.658 | 900.258                   | 883.195 | 865.847 |
| 0.6                                                         | 823.198                    | 813.582 | 801.472 | 865.158                   | 848.119 | 833.614 | 900.005                   | 882.759 | 864.995 |
| 0.8                                                         | 825.554                    | 815.654 | 803.546 | 864.996                   | 848.075 | 833.547 | 901.856                   | 884.584 | 865.688 |
| 1.0                                                         | 825.494                    | 815.598 | 803.502 | 864.935                   | 848.006 | 833.468 | 901.782                   | 884.507 | 865.824 |
| 1.2                                                         | 825.422                    | 815.542 | 803.476 | 864.886                   | 847.984 | 833.405 | 901.716                   | 884.468 | 865.775 |
| 1.4                                                         | 825.381                    | 815.488 | 803.434 | 864.812                   | 847.967 | 833.364 | 901.649                   | 884.408 | 865.711 |
| 1.6                                                         | 825.313                    | 815.426 | 803.384 | 864.759                   | 847.914 | 833.318 | 901.601                   | 884.356 | 865.666 |
| 1.8                                                         | 825.276                    | 815.395 | 803.335 | 864.711                   | 847.863 | 833.286 | 901.579                   | 884.297 | 865.613 |
| <b><math>u/\text{m}\cdot\text{s}^{-1}</math></b>            |                            |         |         |                           |         |         |                           |         |         |
| 0.0                                                         | 1245.26                    | 1233.59 | 1210.65 | 1395.65                   | 1386.26 | 1373.09 | 1598.35                   | 1580.48 | 1571.85 |
| 0.2                                                         | 1241.25                    | 1228.35 | 1204.65 | 1386.98                   | 1371.65 | 1359.65 | 1586.95                   | 1570.26 | 1562.95 |
| 0.4                                                         | 1241.31                    | 1228.51 | 1204.86 | 1387.16                   | 1371.83 | 1359.87 | 1587.06                   | 1570.39 | 1563.14 |
| 0.6                                                         | 1241.49                    | 1228.62 | 1204.99 | 1387.36                   | 1371.96 | 1360.15 | 1587.29                   | 1570.47 | 1563.36 |
| 0.8                                                         | 1241.68                    | 1228.77 | 1205.16 | 1387.47                   | 1372.19 | 1360.39 | 1587.48                   | 1570.62 | 1563.58 |
| 1.0                                                         | 1241.85                    | 1228.94 | 1205.48 | 1387.59                   | 1372.38 | 1360.52 | 1587.62                   | 1570.77 | 1563.72 |
| 1.2                                                         | 1242.01                    | 1229.28 | 1205.64 | 1387.78                   | 1372.49 | 1360.68 | 1587.83                   | 1570.91 | 1563.8  |
| 1.4                                                         | 1242.27                    | 1229.37 | 1205.81 | 1387.86                   | 1372.64 | 1360.83 | 1588.01                   | 1571.09 | 1563.97 |
| 1.6                                                         | 1242.33                    | 1229.49 | 1206.03 | 1387.91                   | 1372.77 | 1360.91 | 1588.28                   | 1571.22 | 1564.08 |
| 1.8                                                         | 1242.36                    | 1229.51 | 1206.09 | 1387.98                   | 1372.81 | 1360.99 | 1588.33                   | 1571.34 | 1564.11 |
| <b><math>10^{-10}\cdot\kappa_s\text{ TPa}^{-1}</math></b>   |                            |         |         |                           |         |         |                           |         |         |
| 0.2                                                         | 7.861                      | 8.128   | 8.579   | 6.004                     | 6.266   | 6.491   | 4.402                     | 4.586   | 4.722   |
| 0.4                                                         | 7.869                      | 8.136   | 8.585   | 6.004                     | 6.264   | 6.486   | 4.410                     | 4.591   | 4.726   |
| 0.6                                                         | 7.882                      | 8.143   | 8.593   | 6.005                     | 6.264   | 6.484   | 4.410                     | 4.593   | 4.730   |
| 0.8                                                         | 7.857                      | 8.120   | 8.568   | 6.005                     | 6.262   | 6.482   | 4.399                     | 4.582   | 4.725   |
| 1.0                                                         | 7.855                      | 8.118   | 8.564   | 6.004                     | 6.261   | 6.482   | 4.399                     | 4.582   | 4.723   |
| 1.2                                                         | 7.854                      | 8.114   | 8.562   | 6.003                     | 6.260   | 6.480   | 4.398                     | 4.581   | 4.723   |
| 1.4                                                         | 7.851                      | 8.114   | 8.560   | 6.003                     | 6.259   | 6.479   | 4.398                     | 4.580   | 4.722   |
| 1.6                                                         | 7.851                      | 8.113   | 8.558   | 6.003                     | 6.258   | 6.479   | 4.396                     | 4.580   | 4.722   |
| 1.8                                                         | 7.851                      | 8.113   | 8.557   | 6.002                     | 6.258   | 6.478   | 4.396                     | 4.580   | 4.722   |

\*  $\kappa_s$   $\text{TPa}^{-1}\cdot 10^{-9}$ . Standard uncertainties in  $\rho$ ,  $u$  and  $\kappa_s$  are  $\pm 5\cdot 10^{-3}\text{ kg}\cdot\text{m}^{-3}$ ,  $\pm 0.4\text{ m}\cdot\text{s}^{-1}$  and  $\pm 0.20\cdot 10^{-10}\text{ TPa}^{-1}$ . For temperature measurements (T/K), it comes out to be  $\pm 0.01\text{ K}$
